# Supplementary material for: Illustration of charge transfer in graphene-coated hexagonal ZnO photocatalysts using Kelvin probe force microscopy
Source: Royal Society of Chemistry journal article supplement (doi:10.1039/c7ra12037k), 2018-01-01
Supplement: c7ra12037k1.pdf [file c7ra12037k1.pdf]

Supporting information for:

**Illustration of charge transfer in graphene-coated hexagonal ZnO photocatalysts using Kelvin probe force microscope**

Yunlong Zhang<sup>a,b</sup>, Yuzhi Zhang<sup>a,\*</sup>, Lixin Song<sup>a,\*</sup>, Yang Su<sup>b</sup>, Yunfeng Guo<sup>a,c</sup>, Lingnan Wu<sup>a</sup>, Tao Zhang<sup>a</sup>

<sup>a</sup> The key Laboratory of Inorganic Coating Materials, Shanghai Institute of Ceramics, Chinese Academy of Sciences, 1295 Dingxi Road, Shanghai, 200050

<sup>b</sup> University of Chinese Academy of Sciences, Beijing 100049, China

\*Corresponding author. E-mail addresses: [lsxong@mail.sic.ac.cn](mailto:lsxong@mail.sic.ac.cn)

\*Corresponding author. E-mail addresses: [yzzhang@mail.sic.ac.cn](mailto:yzzhang@mail.sic.ac.cn)

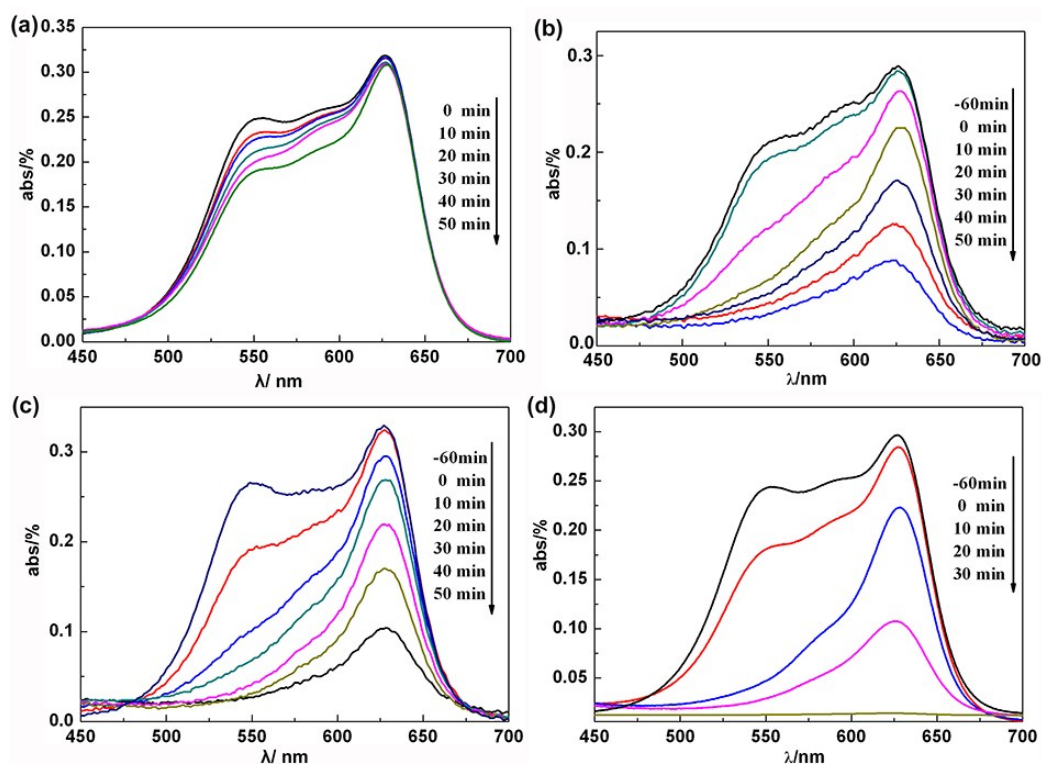

**Fig. S1. The time-dependent absorption spectra of MB solution in the presence of (a) blank, (b) HZO (unanneal), (c) HZO (anneal) and (d) HZO@Gr.**
